# Supplementary material
Source: PubMed Central journal article supplement (PMC6026271)
Supplement: mmc1.pdf [file mmc1.pdf]

## Improved Early Detection of Sepsis in the ED With a Novel Monocyte Distribution Width Biomarker

*Elliott D. Crouser, MD; Joseph E. Parrillo, MD; Christopher Seymour, MD; Derek C. Angus, MD, MPH; Keri Bicking, PharmD; Liliana Tejedor, PhD; Robert Magari, PhD; Diana Careaga, BS; JoAnna Williams, MD; Douglas R. Closser, MD; Michael Samoszuk, MD; Luke Herren, BA; Emily Robart, BS; and Fernando Chaves, MD*

CHEST 2017; 152(3):518-526

*Online supplements are not copyedited prior to posting and the author(s) take full responsibility for the accuracy of all data.*

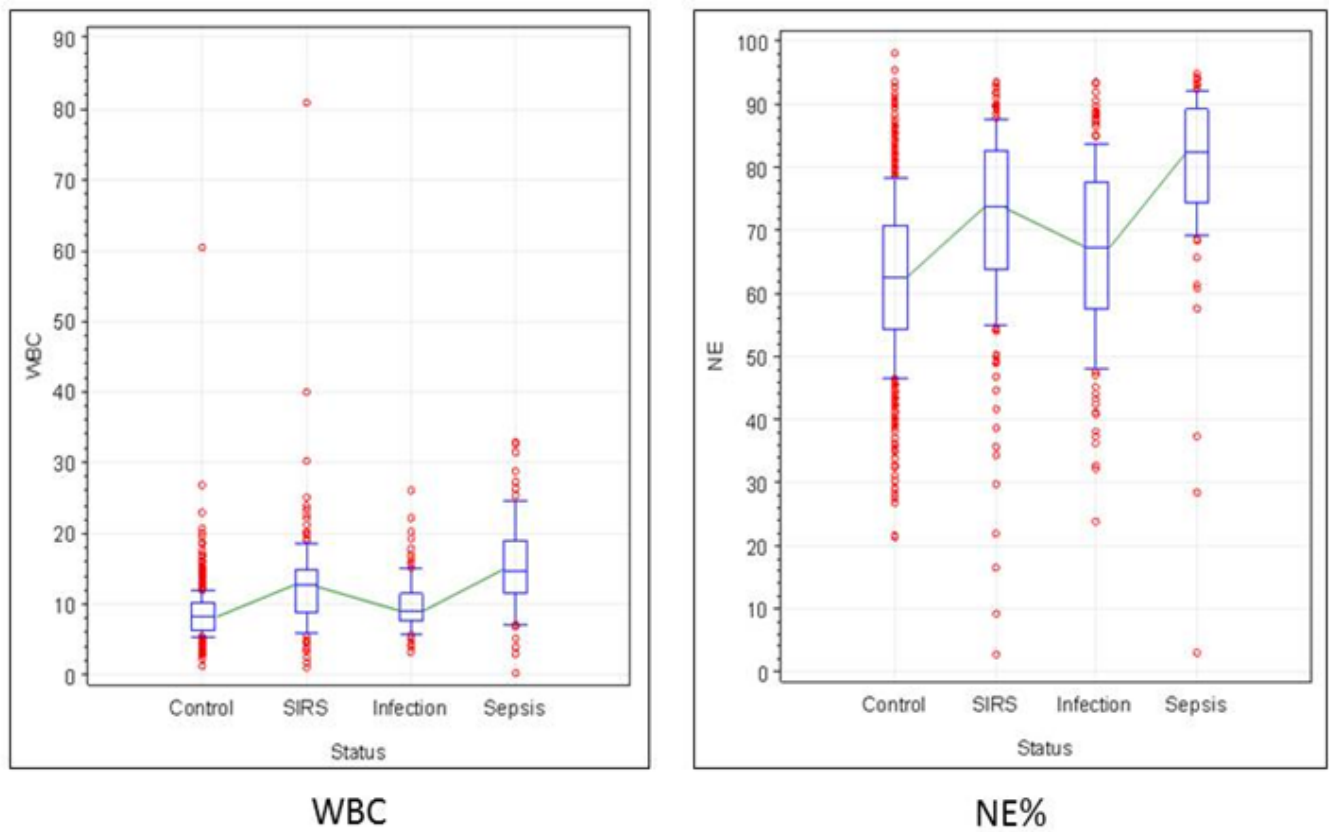

**e-Figure 1. White blood count (WBC) and neutrophil percent (NE%) performance for sepsis in the ED population.** Left Panel, WBC is noted to be elevated in the SIRS and sepsis groups relative to control and infection groups. Right Panel, NE% is elevated in SIRS and sepsis groups compared to control and infection groups. There was no statistically significant difference of either parameter when comparing SIRS and sepsis.

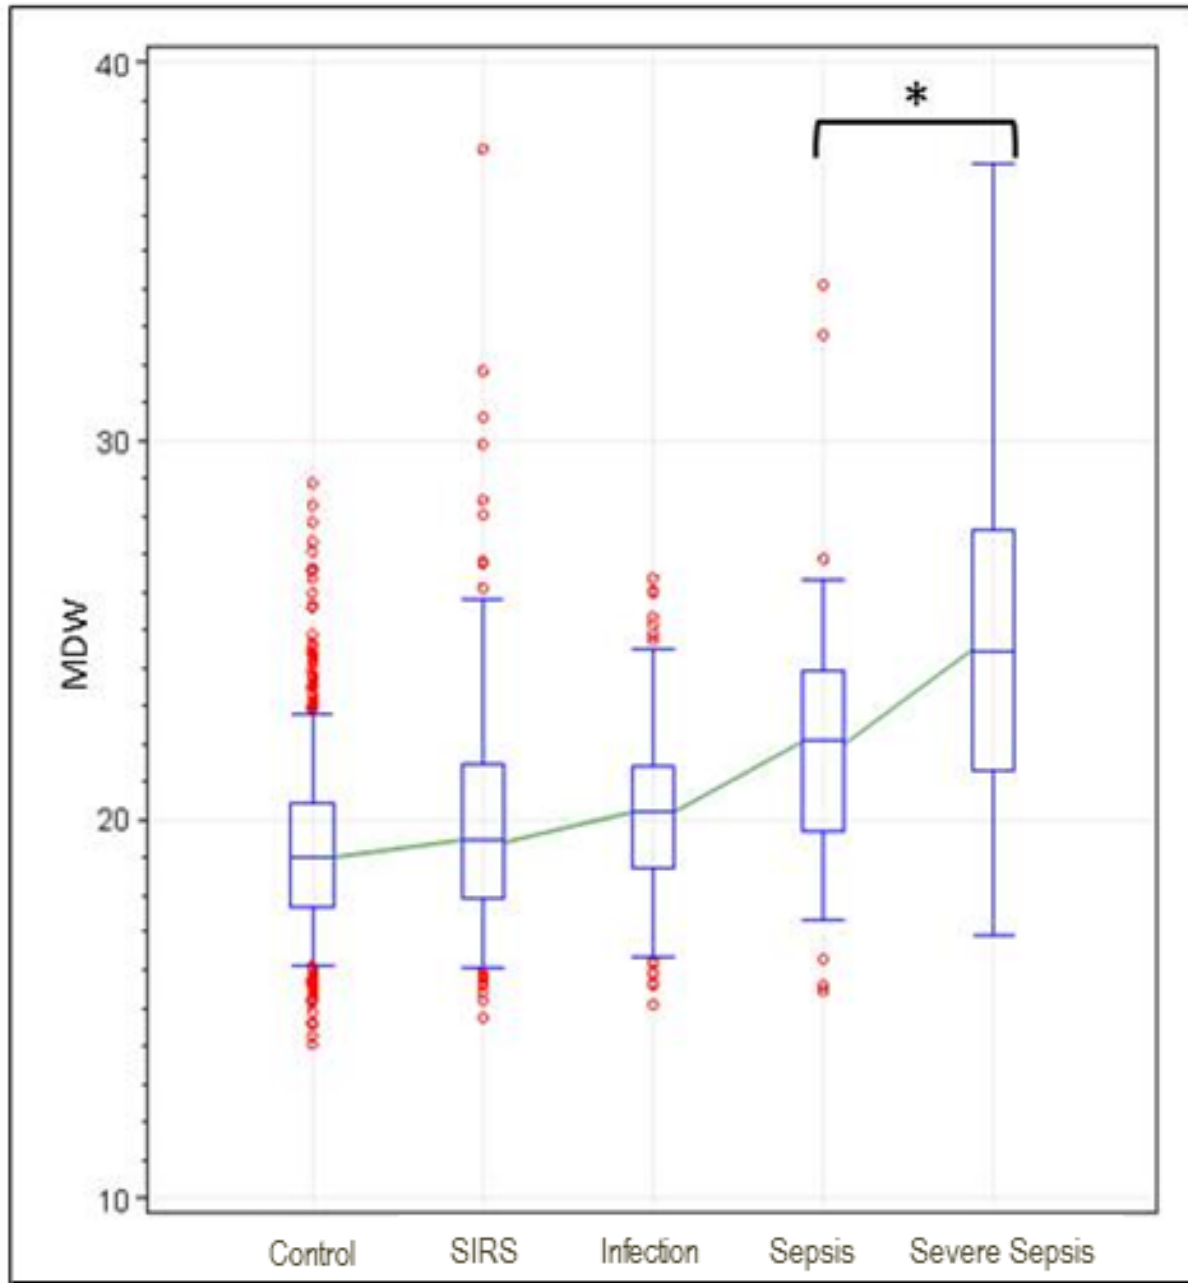

**e-Figure 2. Monocyte distribution width (MDW) increases with severity of infection in the ED population.** MDW is shown to incrementally increase when comparing controls, SIRS and infection groups. More dramatic increases in MDW are observed in patients with sepsis and are highest in those with “advanced sepsis” (severe sepsis + septic shock, labeled as “Severe Sepsis”). [ $*P < 0.01$  advanced sepsis vs sepsis;  $P < 0.001$  Advanced sepsis vs non-septic (control + infection + SIRS)].

**e-Table 1:** Preexisting conditions associated with macrocytosis or otherwise expected to promote impaired immune responses in the ED population.

| <b>Condition</b>                | <b>Description</b>                                                                                                                                                                                                                                                                                                  |
|---------------------------------|---------------------------------------------------------------------------------------------------------------------------------------------------------------------------------------------------------------------------------------------------------------------------------------------------------------------|
| Neutropenia                     | Absolute neutrophil count <1,500/ $\mu$ L                                                                                                                                                                                                                                                                           |
| Drugs used to treat neutropenia | Neupogen, Filgrastim, Granix, Sargramostime.                                                                                                                                                                                                                                                                        |
| Immune compromised state        | HIV infection, organ or bone marrow transplantation, malignancy, hematologic (lymphomas, multiple myeloma, acute and chronic leukemias, myelodysplastic syndromes, aplastic anemia).                                                                                                                                |
| Immune modulating drugs         | Chronic treatments ( $\geq 2$ weeks) with corticosteroids (prednisone $\geq 20$ mg/day), anti-TNF $\alpha$ molecules, methotrexate ( $\geq 15$ mg/week), azathioprine ( $\geq 75$ mg/day), cyclophosphamide (any dose) or mycophenylate ( $\geq 1000$ mg/day) or any combination of these treatments (at any dose). |
| Hydroxyurea                     | Treatment within one week                                                                                                                                                                                                                                                                                           |
| Alcoholism                      | As defined by the CDC ( $\geq 15$ drinks/week for men; $\geq 8$ drinks/week for women) or a blood alcohol level exceeding the legal limit (0.08%)                                                                                                                                                                   |
| Current antibiotic use          | Subjects treated with antibiotics within the past 7 days prior to ED presentation (i.e., recently infected).                                                                                                                                                                                                        |

**e-Table 2.** Emergency Department Population Demographics

|                                         | <b>Summary Demographics by Group</b> |              |                   |
|-----------------------------------------|--------------------------------------|--------------|-------------------|
|                                         | <b>Sepsis</b>                        | <b>SIRS</b>  | <b>Non-Sepsis</b> |
| <b>Total Subjects</b>                   | 98                                   | 203          | 1222              |
| <b>Subject Age - Mean (Min - Max)</b>   | 50 (18 - 84)                         | 48 (18 - 89) | 46 ( 18 - 90)     |
| <b>Male gender, no. (%)</b>             | 43 (44%)                             | 97 (48%)     | 610 (50%)         |
| <b>Race:</b>                            |                                      |              |                   |
| African/Black                           | 16                                   | 56           | 421               |
| American Indian or Alaska Native        | 1                                    | 0            | 1                 |
| Asian                                   | 0                                    | 5            | 19                |
| Middle Eastern                          | 0                                    | 0            | 1                 |
| Native Hawaiian, other Pacific Islander | 0                                    | 2            | 4                 |
| White                                   | 77                                   | 131          | 729               |
| Unknown                                 | 4                                    | 9            | 47                |
| <b>Comorbid Illness, no. (%):</b>       |                                      |              |                   |
| Alcoholism                              | 2 (2)                                | 17 (8)       | 43 (4)            |
| Malignancy                              | 16 (16)                              | 14 (7)       | 33 (3)            |
| Renal Disease                           | 13 (13)                              | 14 (7)       | 41 (4)            |
| Liver Disease                           | 3 (3)                                | 2 (3)        | 25 (2)            |
| Post-Surgical                           | 5 (5)                                | 0 (0)        | 3 (0)             |
| Bronchitis / COPD                       | 1 (1)                                | 8 (4)        | 11 (1)            |

**e-Table 3.** Summary of Cell Population Data (CPD) and CBC data from the ED population (n=1320 total) based upon clinical category.

| Analyte | Status    | N   | Mean   | Standard Deviation | Min    | Max    |
|---------|-----------|-----|--------|--------------------|--------|--------|
| MCV     | Control   | 879 | 88.02  | 6.56               | 58.96  | 115.00 |
|         | Infection | 140 | 88.32  | 6.13               | 71.75  | 107.67 |
|         | SIRS      | 203 | 87.93  | 7.75               | 62.36  | 118.78 |
|         | Sepsis    | 98  | 87.36  | 7.05               | 59.00  | 106.33 |
| MMV     | Control   | 879 | 176.62 | 8.42               | 158.66 | 228.55 |
|         | Infection | 140 | 180.90 | 8.58               | 162.46 | 221.71 |
|         | SIRS      | 203 | 177.44 | 8.70               | 157.09 | 206.29 |
|         | Sepsis    | 98  | 186.94 | 11.20              | 163.01 | 220.16 |
| MDW     | Control   | 879 | 19.24  | 2.39               | 14.09  | 50.49  |
|         | Infection | 140 | 20.25  | 2.25               | 15.12  | 26.40  |
|         | SIRS      | 203 | 19.99  | 3.18               | 14.74  | 37.71  |
|         | Sepsis    | 98  | 22.63  | 3.66               | 15.48  | 37.33  |
| MNV     | Control   | 879 | 151.38 | 8.73               | 130.47 | 188.25 |
|         | Infection | 140 | 153.59 | 8.58               | 132.45 | 178.39 |
|         | SIRS      | 203 | 153.61 | 9.46               | 132.05 | 189.43 |
|         | Sepsis    | 98  | 159.09 | 11.01              | 140.53 | 189.16 |
| NDW     | Control   | 879 | 18.25  | 1.84               | 14.81  | 35.90  |
|         | Infection | 140 | 18.75  | 1.90               | 15.09  | 30.21  |
|         | SIRS      | 203 | 19.50  | 3.33               | 15.38  | 39.34  |
|         | Sepsis    | 98  | 20.61  | 3.33               | 17.27  | 42.99  |
| MO      | Control   | 879 | 8.25   | 2.97               | 0.31   | 27.91  |
|         | Infection | 140 | 8.60   | 3.18               | 2.97   | 25.77  |
|         | SIRS      | 203 | 7.73   | 4.42               | 0.95   | 40.64  |
|         | Sepsis    | 98  | 8.08   | 7.82               | 0.89   | 76.33  |
| NE      | Control   | 879 | 62.51  | 12.62              | 21.31  | 98.14  |
|         | Infection | 140 | 67.01  | 14.31              | 23.78  | 93.56  |
|         | SIRS      | 203 | 71.38  | 15.27              | 2.62   | 93.71  |
|         | Sepsis    | 98  | 80.15  | 13.55              | 2.88   | 94.91  |
| PLT     | Control   | 879 | 235.19 | 80.55              | 10.22  | 660.65 |
|         | Infection | 140 | 249.54 | 91.02              | 66.61  | 746.13 |
|         | SIRS      | 203 | 253.49 | 98.87              | 3.51   | 575.33 |
|         | Sepsis    | 98  | 259.45 | 117.77             | 15.40  | 635.09 |
| WBC     | Control   | 879 | 8.62   | 3.47               | 1.23   | 60.36  |
|         | Infection | 140 | 10.00  | 3.82               | 3.15   | 26.16  |
|         | SIRS      | 203 | 12.63  | 7.08               | 1.01   | 80.81  |
|         | Sepsis    | 98  | 15.61  | 6.53               | 0.39   | 32.80  |

MCV = mean corpuscular volume  
 MMV = mean monocyte volume  
 MDW = monocyte distribution width  
 MNV = mean neutrophil volume  
 NDW = neutrophil distribution width  
 MO = monocyte %  
 NE = neutrophil %  
 PLT = platelet count in thousands  
 WBC = white blood cell count in thousands

**e-Table 4.** Cutoff values for each measure CPD and CBC parameter, and the distribution of ED patients (n=1320 total) based upon test performance.

| Sepsis vs. Non-Sepsis |         |               |                |               |                |       |
|-----------------------|---------|---------------|----------------|---------------|----------------|-------|
| Analyte               | Cut-off | True Positive | False Negative | True Negative | False Positive | TOTAL |
| MCV                   | 88.00   | 49            | 49             | 612           | 610            | 1320  |
| MMV                   | 180.00  | 69            | 29             | 822           | 400            | 1320  |
| MDW                   | 20.50   | 75            | 23             | 873           | 349            | 1320  |
| MNV                   | 152.00  | 70            | 28             | 659           | 563            | 1320  |
| NDW                   | 18.80   | 73            | 25             | 819           | 403            | 1320  |
| MO                    | 6.30    | 37            | 61             | 887           | 335            | 1320  |
| NE                    | 75.00   | 71            | 27             | 938           | 284            | 1320  |
| PLT                   | 250.00  | 45            | 53             | 734           | 488            | 1320  |
| WBC                   | 12.00   | 73            | 25             | 983           | 239            | 1320  |

MCV = mean corpuscular volume  
 MMV = mean monocyte volume  
 MDW = monocyte distribution width  
 MNV = mean neutrophil volume  
 NDW = neutrophil distribution width  
 MO = monocyte %  
 NE = neutrophil %  
 PLT = platelet count in thousands  
 WBC = white blood cell count in thousands

**e-Table 5.** Clinical accuracy of CPD parameters for sepsis detection in the ED population.

| Sepsis vs. Non-Sepsis |      |                         |       |         |             |                         |       |             |                         |       |
|-----------------------|------|-------------------------|-------|---------|-------------|-------------------------|-------|-------------|-------------------------|-------|
| Parameter             | AUC  | 95% Confidence Interval |       | Cut-Off | Sensitivity | 95% Confidence Interval |       | Specificity | 95% Confidence Interval |       |
|                       |      | Lower                   | Upper |         |             | Lower                   | Upper |             | Lower                   | Upper |
| WBC                   | 0.81 | 0.76                    | 0.86  | 12.00   | 0.75        | 0.65                    | 0.82  | 0.80        | 0.78                    | 0.83  |
| NE                    | 0.83 | 0.79                    | 0.88  | 75.00   | 0.73        | 0.63                    | 0.80  | 0.77        | 0.74                    | 0.79  |
| MNV                   | 0.69 | 0.63                    | 0.74  | 152.00  | 0.71        | 0.62                    | 0.79  | 0.54        | 0.51                    | 0.57  |
| NDW                   | 0.77 | 0.73                    | 0.82  | 18.80   | 0.75        | 0.65                    | 0.82  | 0.67        | 0.64                    | 0.70  |
| MMV                   | 0.76 | 0.71                    | 0.81  | 180.00  | 0.70        | 0.61                    | 0.79  | 0.67        | 0.65                    | 0.70  |
| MDW                   | 0.78 | 0.73                    | 0.84  | 20.50   | 0.77        | 0.67                    | 0.84  | 0.72        | 0.69                    | 0.74  |

MDW = monocyte distribution width  
MMV = mean monocyte volume  
MNV = mean neutrophil volume  
NDW = neutrophil distribution width  
NE = neutrophil %  
WBC = white blood cell count



**e-Table 6.** Effect of preexisting conditions associated with altered immune status (see e-Table 1) on the performance of CPD and CBC parameters for discrimination of sepsis from SIRS in the ED population. Exclusion of ~17% of ED patients based upon conditions that are known to have risk factors for altered immune status or macrocytosis (i.e., “without” exclusion criteria) modestly improves the performance of CPD and CBC parameters in the ED population.

| Sepsis vs. SIRS |                         |      |                         |       |         |             |                         |       |             |                         |       |
|-----------------|-------------------------|------|-------------------------|-------|---------|-------------|-------------------------|-------|-------------|-------------------------|-------|
| Parameter       | Pre-Existing Conditions | AUC  | 95% Confidence Interval |       | Cut-Off | Sensitivity | 95% Confidence Interval |       | Specificity | 95% Confidence Interval |       |
|                 |                         |      | Lower                   | Upper |         |             | Lower                   | Upper |             | Lower                   | Upper |
| WBC             | Without                 | 0.73 | 0.64                    | 0.82  | 12.00   | 0.81        | 0.67                    | 0.90  | 0.39        | 0.32                    | 0.47  |
|                 | With [All]              | 0.66 | 0.59                    | 0.73  | 12.00   | 0.75        | 0.65                    | 0.82  | 0.41        | 0.35                    | 0.48  |
| NE              | Without                 | 0.76 | 0.69                    | 0.84  | 75.00   | 0.79        | 0.64                    | 0.88  | 0.52        | 0.44                    | 0.59  |
|                 | With [All]              | 0.70 | 0.64                    | 0.77  | 75.00   | 0.73        | 0.63                    | 0.80  | 0.522       | 0.45                    | 0.59  |
| MNV             | Without                 | 0.69 | 0.60                    | 0.78  | 152.00  | 0.81        | 0.67                    | 0.90  | 0.46        | 0.38                    | 0.53  |
|                 | With [All]              | 0.64 | 0.58                    | 0.71  | 152.00  | 0.71        | 0.62                    | 0.79  | 0.44        | 0.38                    | 0.51  |
| NDW             | Without                 | 0.75 | 0.67                    | 0.83  | 18.80   | 0.74        | 0.59                    | 0.85  | 0.58        | 0.50                    | 0.65  |
|                 | With [All]              | 0.68 | 0.61                    | 0.74  | 18.80   | 0.75        | 0.65                    | 0.82  | 0.52        | 0.45                    | 0.59  |
| MMV             | Without                 | 0.77 | 0.69                    | 0.85  | 180.00  | 0.69        | 0.54                    | 0.81  | 0.70        | 0.62                    | 0.76  |
|                 | With [All]              | 0.75 | 0.69                    | 0.81  | 180.00  | 0.70        | 0.61                    | 0.79  | 0.66        | 0.59                    | 0.72  |
| MDW             | Without                 | 0.78 | 0.70                    | 0.87  | 20.50   | 0.79        | 0.64                    | 0.88  | 0.68        | 0.60                    | 0.75  |
|                 | With [All]              | 0.74 | 0.68                    | 0.80  | 20.50   | 0.77        | 0.67                    | 0.84  | 0.63        | 0.56                    | 0.70  |

MDW = monocyte distribution width  
MMV = mean monocyte volume  
MNV = mean neutrophil volume  
NDW = neutrophil distribution width  
NE = neutrophil %  
WBC = white blood cell count (in thousands)
